# Supplementary material for: Short communication: Inverse correlation between radiation damage and fission-track etching time on monazite
Source: Copernicus journal article supplement (doi:10.5194/gchron-6-313-2024), 2024-07-03
Supplement: Supplementary file 1 [file gchron-6-313-2024-supplement.zip]

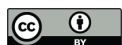

*Supplement of*

## **Short communication: Inverse correlation between radiation damage and fission-track etching time on monazite**

**Toru Nakajima et al.**

*Correspondence to:* Toru Nakajima ([nakajima.toru@jaea.go.jp](mailto:nakajima.toru@jaea.go.jp))

- [gchron-6-313-2024-supplement-title-page.pdf](#)
- [Tables\\_S1-S5\\_chemical\\_composition.xlsx](#)
- [Tables\\_S6-S10\\_raman.xlsx](#)

The copyright of individual parts of the supplement might differ from the article licence.
