# Supplementary material for: Short communication: Inverse correlation between radiation damage and fission-track etching time on monazite
Source: Copernicus journal article supplement (doi:10.5194/gchron-6-313-2024), 2024-07-03
Supplement: Supplementary file 1 [file Tables_S1-S5_chemical_composition.xlsx]

## Sheet: Table S-1
Table S-1. Full results of electron probe micro analysis of monazites in Toya-5b.
Spot No.		SiO2	P2O5	CaO	Y2O3	ThO2	UO2	PbO	La2O3	Ce2O3	Pr2O3	Nd2O3	Sm2O3	Eu2O3	Gd2O3	Tb2O3	Dy2O3	Ho2O3	Er2O3	Tm2O3	Yb2O3	Total
Toya-5b-01		0.402	29.248	0.197	1.637	2.014	n.d.	n.d.	11.501	30.408	2.89	14.186	2.088	n.d.	4.301	n.d.	0.442	0.71	n.d.	0.021	n.d.	100.045
Toya-5b-02		0.347	29.49	0.202	1.374	2.021	n.d.	n.d.	11.334	30.834	2.885	14.234	2.05	n.d.	4.237	n.d.	0.419	0.711	n.d.	n.d.	n.d.	100.142
Toya-5b-03		0.408	29.413	0.223	1.656	2.089	n.d.	n.d.	11.373	30.308	2.83	13.945	2.138	n.d.	4.295	n.d.	0.504	0.761	n.d.	n.d.	n.d.	99.943
Toya-5b-04		0.415	29.243	0.225	1.329	1.946	n.d.	n.d.	11.893	30.865	2.869	13.747	1.952	n.d.	4.166	n.d.	0.416	0.639	n.d.	n.d.	n.d.	99.706
Toya-5b-05		0.394	29.281	0.173	1.468	1.903	n.d.	n.d.	10.938	30.329	2.932	14.404	2.178	n.d.	4.333	n.d.	0.513	0.76	n.d.	0.018	n.d.	99.624
Toya-5b-06		0.435	29.246	0.252	1.703	2.155	n.d.	n.d.	11.012	30.131	2.963	14.286	2.214	n.d.	4.316	n.d.	0.54	0.792	n.d.	n.d.	n.d.	100.045
Toya-5b-07		0.397	29.148	0.244	1.918	2.347	n.d.	n.d.	11.07	29.873	2.964	14.127	2.243	n.d.	4.331	n.d.	0.554	0.76	n.d.	0.039	n.d.	100.015
Toya-5b-08		0.393	29.086	0.213	1.953	2.43	n.d.	n.d.	10.674	29.961	2.924	14.364	2.243	n.d.	4.393	n.d.	0.546	0.827	0.01	0.05	n.d.	100.067
Toya-5b-09		0.377	29.167	0.196	1.58	2.089	n.d.	n.d.	11.357	30.46	2.842	14.114	2.163	n.d.	4.212	n.d.	0.423	0.674	n.d.	0.023	n.d.	99.677
Toya-5b-10		0.369	29.147	0.21	1.539	1.96	n.d.	n.d.	11.38	30.379	2.81	13.722	2.078	n.d.	4.216	n.d.	0.49	0.673	n.d.	n.d.	n.d.	98.973
Toya-5b-11		0.41	29.334	0.232	1.683	2.125	n.d.	n.d.	11.26	30.052	2.961	14.016	2.095	n.d.	4.321	n.d.	0.496	0.779	n.d.	0.033	n.d.	99.797
Toya-5b-12		0.402	29.619	0.248	1.858	2.205	n.d.	n.d.	10.901	29.833	3.012	14.51	2.311	n.d.	4.399	n.d.	0.598	0.821	n.d.	n.d.	n.d.	100.717
Toya-5b-13		0.388	29.328	0.2	1.521	2.06	n.d.	n.d.	11.424	30.701	2.97	14.075	2.043	n.d.	4.143	n.d.	0.488	0.736	n.d.	n.d.	n.d.	100.085
Toya-5b-14		0.386	29.125	0.24	1.879	2.186	n.d.	n.d.	11.045	30.157	2.945	14.162	2.152	n.d.	4.268	n.d.	0.5	0.769	n.d.	n.d.	n.d.	99.814
Toya-5b-15		0.314	29.278	0.197	1.203	1.788	n.d.	n.d.	12.114	31.567	2.907	13.966	1.941	n.d.	4.132	n.d.	0.339	0.61	n.d.	n.d.	n.d.	100.356
Toya-5b-16		0.355	29.398	0.168	1.453	1.828	n.d.	n.d.	11.329	30.999	3.037	14.414	2.183	n.d.	4.366	n.d.	0.485	0.732	n.d.	n.d.	n.d.	100.747
Toya-5b-17		0.438	28.965	0.218	1.668	2.383	n.d.	n.d.	10.912	29.926	2.936	14.305	2.111	n.d.	4.164	n.d.	0.563	0.706	n.d.	n.d.	n.d.	99.295
Toya-5b-18		0.4	29.346	0.201	1.392	2.001	n.d.	n.d.	11.71	30.56	3.021	13.819	1.921	n.d.	4.074	n.d.	0.377	0.678	n.d.	0.004	n.d.	99.504
Toya-5b-19		0.396	29.084	0.235	1.545	2.047	n.d.	n.d.	11.34	30.105	2.856	13.833	2.115	n.d.	4.189	n.d.	0.418	0.724	n.d.	n.d.	n.d.	98.887
Toya-5b-20		0.349	29.254	0.198	1.391	1.879	n.d.	n.d.	11.617	30.494	2.876	13.734	2.063	n.d.	4.275	n.d.	0.41	0.68	n.d.	0.032	n.d.	99.254
Toya-5b-21		0.381	29.148	0.207	1.428	2.159	n.d.	n.d.	11.637	30.872	2.869	13.814	2.025	n.d.	4.227	n.d.	0.488	0.709	n.d.	n.d.	n.d.	99.969
Toya-5b-22		0.396	29.234	0.225	1.64	2.257	n.d.	n.d.	11.331	30.112	2.844	13.794	2.105	n.d.	4.342	n.d.	0.503	0.792	n.d.	0.018	n.d.	99.593
Toya-5b-23		0.361	29.337	0.216	1.504	1.994	n.d.	n.d.	11.313	30.594	2.96	14.251	2.094	n.d.	4.167	n.d.	0.448	0.751	n.d.	n.d.	n.d.	99.99
Toya-5b-24		0.407	29.364	0.215	1.606	2.058	n.d.	n.d.	11.318	29.945	2.869	14.103	2.234	n.d.	4.289	n.d.	0.461	0.788	n.d.	n.d.	n.d.	99.657
Toya-5b-25		0.434	29.142	0.2	1.401	2.31	n.d.	n.d.	11.952	30.639	2.787	13.885	1.922	n.d.	4.109	n.d.	0.439	0.616	n.d.	n.d.	n.d.	99.836
Toya-5b-26		0.369	29.092	0.198	1.472	2.033	n.d.	n.d.	11.756	30.754	2.911	14.151	2.023	n.d.	4.238	n.d.	0.413	0.683	n.d.	n.d.	n.d.	100.095
Toya-5b-27		0.423	29.204	0.203	1.543	2.16	n.d.	n.d.	11.548	30.619	2.964	14.017	2.046	n.d.	4.233	n.d.	0.464	0.735	n.d.	n.d.	n.d.	100.159
Toya-5b-28		0.444	29.174	0.236	1.747	2.529	n.d.	n.d.	10.933	30.043	2.92	14.18	2.175	n.d.	4.247	n.d.	0.53	0.75	n.d.	n.d.	n.d.	99.916
Toya-5b-29		0.381	29.187	0.221	1.571	2.304	n.d.	n.d.	11.269	30.337	2.961	13.942	2.097	n.d.	4.306	n.d.	0.476	0.691	0.014	n.d.	n.d.	99.757
Toya-5b-30		0.39	29.361	0.216	1.65	2.135	n.d.	n.d.	11.187	30.379	2.903	14.17	2.166	n.d.	4.305	n.d.	0.501	0.736	n.d.	0.027	n.d.	100.126
Toya-5b-31		0.363	28.968	0.196	1.493	1.879	n.d.	n.d.	11.254	30.695	2.942	14.104	2.115	n.d.	4.271	n.d.	0.445	0.714	n.d.	0.009	n.d.	99.448
Toya-5b-32		0.425	28.947	0.2	1.7	2.177	n.d.	n.d.	11.068	29.988	2.953	14.351	2.273	n.d.	4.312	n.d.	0.529	0.807	n.d.	n.d.	n.d.	99.73
Toya-5b-33		0.399	28.983	0.227	1.566	2.149	0.005	n.d.	11.313	30.377	2.946	14.258	2.135	n.d.	4.237	n.d.	0.533	0.77	n.d.	n.d.	n.d.	99.898
Toya-5b-34		0.335	29.339	0.23	1.284	1.857	n.d.	n.d.	11.534	30.797	2.908	14.096	2.007	n.d.	4.31	n.d.	0.395	0.666	n.d.	n.d.	n.d.	99.758
Toya-5b-35		0.378	29.217	0.23	1.676	2.12	n.d.	n.d.	11.078	30.024	2.978	14.576	2.211	n.d.	4.394	n.d.	0.521	0.768	n.d.	n.d.	n.d.	100.171
Toya-5b-36		0.376	29.264	0.235	1.73	2.178	n.d.	n.d.	11.251	30.243	2.827	14.382	2.169	n.d.	4.366	n.d.	0.552	0.714	n.d.	n.d.	n.d.	100.287
Toya-5b-37		0.442	29.064	0.269	1.5	1.978	0.008	n.d.	11.888	30.752	2.88	13.66	2.036	n.d.	4.3	n.d.	0.475	0.622	n.d.	n.d.	n.d.	99.874
Toya-5b-38		0.378	29.097	0.242	1.953	2.253	n.d.	n.d.	10.988	29.895	2.917	14.334	2.277	n.d.	4.344	n.d.	0.552	0.781	n.d.	n.d.	n.d.	100.019
Toya-5b-39		0.471	29.388	0.243	1.8	2.416	n.d.	n.d.	10.939	30.052	2.886	14.409	2.168	n.d.	4.321	n.d.	0.529	0.791	n.d.	n.d.	n.d.	100.413
Toya-5b-40		0.402	29.182	0.216	1.692	2.222	n.d.	n.d.	10.934	30.34	3.088	14.537	2.281	n.d.	4.301	n.d.	0.493	0.745	n.d.	n.d.	n.d.	100.433
Toya-5b-41		0.373	29.258	0.197	1.333	1.786	n.d.	n.d.	11.48	30.906	2.932	14.386	2.005	n.d.	4.26	n.d.	0.435	0.693	n.d.	n.d.	n.d.	100.044
Toya-5b-42		0.455	29.136	0.217	1.622	2.044	n.d.	n.d.	11.403	30.417	2.924	14.249	2.135	n.d.	4.265	n.d.	0.52	0.732	n.d.	n.d.	n.d.	100.119
Toya-5b-43		0.457	28.718	0.262	1.741	2.599	0.004	n.d.	11.101	29.977	2.857	14.047	2.154	n.d.	4.24	n.d.	0.488	0.777	n.d.	n.d.	n.d.	99.422
Toya-5b-44		0.395	28.841	0.234	1.754	2.165	n.d.	n.d.	10.796	30.028	2.907	14.026	2.252	n.d.	4.308	n.d.	0.566	0.861	n.d.	n.d.	n.d.	99.133
Toya-5b-45		0.392	29.048	0.238	1.732	2.21	n.d.	n.d.	11.079	29.862	2.972	14.265	2.221	n.d.	4.351	n.d.	0.567	0.83	n.d.	0.01	n.d.	99.777
Toya-5b-46		0.441	29.03	0.257	1.646	2.554	n.d.	n.d.	11.334	30.125	2.872	14.055	2.112	n.d.	4.23	n.d.	0.488	0.72	n.d.	n.d.	n.d.	99.864
Toya-5b-47		0.431	29.164	0.203	1.44	2.087	n.d.	n.d.	11.818	30.761	2.851	13.853	1.999	n.d.	4.221	n.d.	0.417	0.669	n.d.	n.d.	n.d.	99.914
Toya-5b-48		0.389	28.529	0.203	1.623	2.007	n.d.	n.d.	11.26	30.485	2.898	14.161	2.112	n.d.	4.348	n.d.	0.489	0.771	n.d.	0.024	n.d.	99.299
Toya-5b-49		0.398	28.705	0.209	1.766	2.335	n.d.	n.d.	11.043	30.1	2.979	14.391	2.245	n.d.	4.299	n.d.	0.561	0.802	n.d.	n.d.	n.d.	99.833
Toya-5b-50		0.394	28.626	0.23	1.671	2.267	0.008	n.d.	11.146	30.186	2.917	14.161	2.164	n.d.	4.314	n.d.	0.501	0.757	n.d.	n.d.	n.d.	99.342
n.d.: not detected or below detection limit
detection limit(ppm)		32	27	18	70	141	44	119	145	114	193	174	104	309	96	91	109	92	93	92	91

## Sheet: Table S-2
Table S-2. Full results of electron probe micro analysis of monazites in KRG19-B04.
Spot No.		SiO2	P2O5	CaO	Y2O3	ThO2	UO2	PbO	La2O3	Ce2O3	Pr2O3	Nd2O3	Sm2O3	Eu2O3	Gd2O3	Tb2O3	Dy2O3	Ho2O3	Er2O3	Tm2O3	Yb2O3	Total
KRG19-B04-01		1.921	26.636	0.581	2.07	8.666	0.078	n.d.	10.809	28.911	2.567	10.329	1.762	n.d.	3.839	n.d.	0.596	0.562	0.021	n.d.	n.d.	99.348
KRG19-B04-02		1.301	27.279	0.555	2.005	7.978	0.115	n.d.	11.729	29.422	2.499	9.496	1.427	n.d.	3.69	n.d.	0.578	0.473	0.026	n.d.	n.d.	98.573
KRG19-B04-03		1.404	26.955	0.647	2.352	8.551	0.138	n.d.	11.072	28.746	2.469	9.755	1.683	n.d.	3.72	n.d.	0.62	0.531	0.035	0.027	n.d.	98.705
KRG19-B04-04		1.08	27.485	0.74	2.324	7.548	0.096	n.d.	10.801	29.159	2.495	9.85	1.86	n.d.	3.938	n.d.	0.681	0.628	n.d.	0.01	n.d.	98.698
KRG19-B04-05		1.021	27.601	0.673	2.437	7.049	0.082	n.d.	10.943	29.303	2.603	10.083	1.919	n.d.	3.936	n.d.	0.729	0.6	n.d.	n.d.	n.d.	98.984
KRG19-B04-06		1.936	26.349	0.36	1.277	9.553	0.068	n.d.	11.783	29.87	2.527	9.885	1.387	n.d.	3.739	n.d.	0.336	0.419	n.d.	n.d.	n.d.	99.489
KRG19-B04-07		1.598	27.154	0.592	2.417	7.998	0.075	n.d.	10.72	29.226	2.395	10.385	1.684	n.d.	3.885	n.d.	0.622	0.596	0.013	n.d.	n.d.	99.366
KRG19-B04-08		1.029	27.722	0.344	1.171	5.641	0.031	n.d.	12.94	31.753	2.669	10.215	1.417	n.d.	3.797	n.d.	0.304	0.378	n.d.	n.d.	n.d.	99.411
KRG19-B04-09		1.341	27.054	0.523	1.994	8.116	0.121	n.d.	11.768	29.414	2.537	9.546	1.416	n.d.	3.63	n.d.	0.546	0.505	n.d.	0.037	n.d.	98.548
KRG19-B04-10		1.406	27.096	0.593	2.235	8.392	0.144	n.d.	11.378	29.119	2.404	9.859	1.463	n.d.	3.645	n.d.	0.583	0.494	0.045	n.d.	n.d.	98.856
KRG19-B04-11		1.561	26.783	0.584	2.271	9.2	0.143	n.d.	10.842	28.57	2.524	9.698	1.584	n.d.	3.677	n.d.	0.639	0.565	0.039	n.d.	n.d.	98.68
KRG19-B04-12		1.199	27.753	0.489	2.211	6.738	0.045	n.d.	10.867	29.829	2.626	10.724	1.836	n.d.	4.006	n.d.	0.644	0.621	0.045	0.016	n.d.	99.649
KRG19-B04-13		1.224	27.559	0.544	2.937	7.216	0.055	n.d.	10.038	29.185	2.636	10.732	1.998	n.d.	4.167	n.d.	0.804	0.738	0.032	0.027	n.d.	99.892
KRG19-B04-14		1.234	27.505	0.552	2.159	7.605	0.108	n.d.	11.555	29.655	2.485	9.89	1.565	n.d.	3.796	n.d.	0.593	0.537	0.015	n.d.	n.d.	99.261
KRG19-B04-15		2.529	25.28	0.141	1.26	11.39	0.11	n.d.	11.906	29.625	2.461	9.282	1.074	n.d.	3.389	n.d.	0.303	0.313	n.d.	n.d.	n.d.	99.063
KRG19-B04-16		2.009	25.973	0.153	1.357	9.367	0.077	n.d.	12.265	30.349	2.505	9.852	1.189	n.d.	3.569	n.d.	0.347	0.337	n.d.	n.d.	n.d.	99.349
KRG19-B04-17		2.321	25.383	0.153	1.374	10.75	0.088	n.d.	11.817	29.937	2.439	9.659	1.188	n.d.	3.555	n.d.	0.347	0.347	n.d.	n.d.	n.d.	99.363
KRG19-B04-18		1.555	27.048	0.581	2.131	9.143	0.129	n.d.	11.188	28.732	2.536	9.67	1.537	n.d.	3.727	n.d.	0.588	0.55	0.021	n.d.	n.d.	99.136
KRG19-B04-19		1.402	27.065	0.607	2.162	9.135	0.114	n.d.	10.913	28.952	2.515	9.831	1.675	n.d.	3.753	n.d.	0.603	0.5	0.003	n.d.	n.d.	99.23
KRG19-B04-20		1.298	27.29	0.415	2.087	7.517	0.095	n.d.	11.67	30.022	2.65	9.975	1.413	n.d.	3.746	n.d.	0.515	0.488	0.005	n.d.	n.d.	99.186
KRG19-B04-21		1.542	26.867	0.431	1.463	7.97	0.068	n.d.	11.839	30.445	2.491	10.059	1.53	n.d.	3.79	n.d.	0.427	0.464	n.d.	n.d.	n.d.	99.386
KRG19-B04-22		1.114	27.594	0.395	1.354	6.147	0.024	n.d.	12.568	31.384	2.477	10.216	1.427	n.d.	3.863	n.d.	0.341	0.419	0.007	n.d.	n.d.	99.33
KRG19-B04-23		2.038	26.277	0.489	1.616	10.1	0.071	n.d.	11.21	29.113	2.447	10.192	1.444	n.d.	3.668	n.d.	0.468	0.506	n.d.	n.d.	n.d.	99.639
KRG19-B04-24		1.446	27.13	0.59	2.125	8.762	0.134	n.d.	11.382	29.22	2.449	9.742	1.442	n.d.	3.718	n.d.	0.607	0.468	0.047	n.d.	n.d.	99.262
KRG19-B04-25		0.799	27.982	0.099	1.638	3.574	0.031	n.d.	13.178	32.769	2.741	10.579	1.418	n.d.	3.86	n.d.	0.391	0.359	n.d.	n.d.	n.d.	99.418
KRG19-B04-26		1.065	27.848	0.432	1.319	3.883	0.03	n.d.	13.727	32.467	2.487	10.041	1.327	n.d.	3.805	n.d.	0.347	0.403	n.d.	n.d.	n.d.	99.181
KRG19-B04-27		1.102	27.853	0.447	1.307	4.192	0.024	n.d.	13.391	32.214	2.574	10.203	1.391	n.d.	3.833	n.d.	0.347	0.41	n.d.	n.d.	n.d.	99.288
KRG19-B04-28		1.637	26.719	0.654	2.774	9.11	0.099	n.d.	9.9	27.976	2.6	10.379	1.927	n.d.	3.864	n.d.	0.741	0.681	0.011	n.d.	n.d.	99.072
KRG19-B04-29		1.422	27.108	0.745	2.387	9.14	0.129	n.d.	10.345	28.414	2.47	10.063	1.785	n.d.	3.829	n.d.	0.671	0.663	0.015	n.d.	n.d.	99.186
KRG19-B04-30		1.624	26.945	0.613	2.501	8.417	0.063	n.d.	10.192	28.309	2.595	10.531	1.785	n.d.	3.966	n.d.	0.753	0.707	0.02	0.057	n.d.	99.078
KRG19-B04-31		0.98	27.936	0.397	2.344	5.099	0.042	n.d.	11.011	30.446	2.75	11.139	1.849	n.d.	4.1	n.d.	0.624	0.63	n.d.	n.d.	n.d.	99.347
KRG19-B04-32		1.123	27.649	0.47	2.465	6.088	0.09	n.d.	11.892	30.073	2.606	9.754	1.598	n.d.	3.956	n.d.	0.646	0.544	0.042	0.039	n.d.	99.035
KRG19-B04-33		1.219	27.553	0.582	2.192	7.731	0.122	n.d.	11.759	29.696	2.554	9.851	1.492	n.d.	3.758	n.d.	0.527	0.483	n.d.	0.022	n.d.	99.541
KRG19-B04-34		0.689	28.593	0.462	1.586	3.168	0.032	n.d.	14.645	33.523	2.444	8.931	1.062	n.d.	3.75	n.d.	0.272	0.296	0.053	n.d.	n.d.	99.506
KRG19-B04-35		1.779	26.659	0.498	1.272	7.641	0.053	n.d.	12.57	30.406	2.478	9.793	1.331	n.d.	3.641	n.d.	0.329	0.391	n.d.	n.d.	n.d.	98.841
KRG19-B04-36		1.424	27.248	0.487	1.331	5.502	0.048	n.d.	13.078	31.181	2.6	10.082	1.364	n.d.	3.796	n.d.	0.347	0.409	n.d.	n.d.	n.d.	98.897
KRG19-B04-37		1.332	27.424	0.535	1.916	7.902	0.095	n.d.	11.905	29.754	2.516	9.894	1.431	n.d.	3.723	n.d.	0.547	0.47	n.d.	n.d.	n.d.	99.448
KRG19-B04-38		1.19	27.466	0.561	2.014	7.578	0.115	n.d.	11.792	29.816	2.444	9.741	1.479	n.d.	3.754	n.d.	0.553	0.458	n.d.	n.d.	n.d.	98.961
KRG19-B04-39		1.431	27.374	0.353	1.867	7.466	0.095	n.d.	11.817	30.239	2.561	9.841	1.444	n.d.	3.748	n.d.	0.537	0.461	n.d.	n.d.	n.d.	99.241
KRG19-B04-40		1.563	26.767	0.45	1.326	7.014	0.06	n.d.	12.862	30.705	2.508	9.894	1.404	n.d.	3.688	n.d.	0.342	0.429	n.d.	n.d.	n.d.	99.012
KRG19-B04-41		1.477	27.106	0.478	1.271	6.655	0.052	n.d.	12.714	30.946	2.592	10.107	1.396	n.d.	3.709	n.d.	0.343	0.365	n.d.	n.d.	n.d.	99.212
KRG19-B04-42		1.321	27.348	0.416	2.085	7.518	0.108	n.d.	11.72	29.861	2.488	10.012	1.516	n.d.	3.679	n.d.	0.523	0.492	0.058	n.d.	n.d.	99.145
KRG19-B04-43		1.647	26.901	0.503	1.687	8.048	0.067	n.d.	11.721	29.852	2.537	9.926	1.512	n.d.	3.792	n.d.	0.412	0.445	n.d.	n.d.	n.d.	99.05
KRG19-B04-44		1.617	26.908	0.599	1.988	7.842	0.081	n.d.	11.38	29.517	2.462	10.212	1.595	n.d.	3.847	n.d.	0.534	0.52	n.d.	n.d.	n.d.	99.102
KRG19-B04-45		1.362	27.136	0.609	2.228	8.355	0.122	n.d.	11.374	29.167	2.412	9.694	1.485	n.d.	3.692	n.d.	0.577	0.507	0.064	n.d.	n.d.	98.784
KRG19-B04-46		1.079	27.927	0.427	1.947	5.7	0.055	n.d.	11.94	30.731	2.674	10.548	1.628	n.d.	3.956	n.d.	0.502	0.538	0.011	0.021	n.d.	99.684
KRG19-B04-47		1.501	27.451	0.6	2.212	8.511	0.088	n.d.	10.483	28.876	2.525	10.234	1.811	n.d.	3.951	n.d.	0.68	0.632	n.d.	n.d.	n.d.	99.555
KRG19-B04-48		1.357	27.265	0.603	2.199	8.391	0.119	n.d.	11.305	29.251	2.439	9.8	1.503	n.d.	3.764	n.d.	0.569	0.512	n.d.	n.d.	n.d.	99.077
KRG19-B04-49		0.541	28.491	0.427	1.08	2.268	0.023	n.d.	16.231	34.58	2.382	8.113	0.835	n.d.	3.696	n.d.	0.203	0.173	0.042	n.d.	n.d.	99.085
KRG19-B04-50		1.265	27.17	0.392	2.038	7.104	0.099	n.d.	11.682	30.177	2.514	10.026	1.463	n.d.	3.827	n.d.	0.517	0.494	n.d.	n.d.	n.d.	98.78
n.d.: not detected or below detection limit
detection limit(ppm)		32	27	18	70	141	44	119	145	114	193	174	104	309	96	91	109	92	93	92	91

## Sheet: Table S-3
Table S-3. Full results of electron probe micro analysis of monazites in MR3b.
Spot No.		SiO2	P2O5	CaO	Y2O3	ThO2	UO2	PbO	La2O3	Ce2O3	Pr2O3	Nd2O3	Sm2O3	Eu2O3	Gd2O3	Tb2O3	Dy2O3	Ho2O3	Er2O3	Tm2O3	Yb2O3	Total
MR3b-01		0.245	29.137	1.165	3.158	6.519	0.06	n.d.	8.521	27.51	2.707	11.705	2.53	n.d.	4.454	n.d.	0.991	0.98	n.d.	0.092	n.d.	99.774
MR3b-02		0.331	28.964	0.988	2.872	5.849	0.032	n.d.	9.727	28.764	2.615	11.422	2.064	n.d.	4.233	n.d.	0.847	0.872	n.d.	0.043	n.d.	99.623
MR3b-03		0.29	29.01	1.108	3.185	6.194	0.046	n.d.	9.506	28.158	2.54	11.171	2.104	n.d.	4.272	n.d.	0.964	0.826	n.d.	0.063	n.d.	99.437
MR3b-04		0.282	29.227	1.104	3.237	6.213	0.047	n.d.	9.317	28.264	2.551	11.221	2.133	n.d.	4.323	n.d.	0.987	0.911	n.d.	0.068	n.d.	99.886
MR3b-05		0.256	29.119	0.985	2.635	5.482	0.035	n.d.	9.54	28.862	2.643	11.802	2.195	n.d.	4.326	n.d.	0.831	0.862	0.021	n.d.	n.d.	99.598
MR3b-06		0.278	29.215	0.977	2.656	5.654	0.044	n.d.	9.634	28.824	2.661	11.861	2.175	n.d.	4.347	n.d.	0.783	0.842	n.d.	0.023	n.d.	99.974
MR3b-07		0.243	29.123	0.981	3.365	5.187	0.015	n.d.	8.998	28.11	2.595	11.85	2.402	n.d.	4.565	n.d.	0.992	1.019	n.d.	0.068	n.d.	99.513
MR3b-08		0.25	29.226	0.963	3.323	5.183	0.037	n.d.	8.956	28.337	2.588	12.004	2.414	n.d.	4.543	n.d.	0.933	0.991	n.d.	0.021	n.d.	99.769
MR3b-09		0.234	29.373	0.99	3.811	5.664	0.047	n.d.	8.595	27.437	2.662	11.882	2.663	n.d.	4.663	n.d.	1.082	1.073	n.d.	0.108	n.d.	100.284
MR3b-10		0.263	28.686	0.764	1.098	4.401	0.015	n.d.	11.497	31.509	2.656	11.953	1.63	n.d.	3.875	n.d.	0.352	0.464	n.d.	n.d.	n.d.	99.163
MR3b-11		0.047	29.669	1.092	2.706	4.786	0.167	n.d.	10.362	28.844	2.639	11.296	1.983	n.d.	4.016	n.d.	0.823	0.731	n.d.	0.047	n.d.	99.208
MR3b-12		0.106	29.342	1.074	2.49	4.875	0.164	n.d.	10.514	29.202	2.713	11.282	1.972	n.d.	4.045	n.d.	0.725	0.701	n.d.	0.02	n.d.	99.225
MR3b-13		0.296	29.263	1.131	3.684	6.64	0.053	n.d.	8.954	27.639	2.481	10.94	2.277	n.d.	4.38	n.d.	1.078	0.938	0.035	0.067	n.d.	99.856
MR3b-14		0.296	29.148	1.11	3.444	6.163	0.048	n.d.	8.964	27.799	2.552	11.546	2.3	n.d.	4.458	n.d.	1.027	0.999	0.009	0.037	n.d.	99.9
MR3b-15		0.298	29.227	1.06	3.137	6	0.055	n.d.	9.574	28.199	2.635	11.202	2.158	n.d.	4.245	n.d.	0.964	0.843	n.d.	0.014	n.d.	99.611
MR3b-16		0.19	29.123	0.972	2.778	5.252	0.054	n.d.	9.365	28.968	2.706	11.485	2.32	n.d.	4.386	n.d.	0.855	0.842	n.d.	0.025	n.d.	99.321
MR3b-17		0.227	29.132	0.885	1.834	5.11	0.021	n.d.	10.705	30.289	2.748	12.014	1.903	n.d.	4.027	n.d.	0.531	0.646	n.d.	0.024	n.d.	100.096
MR3b-18		0.179	29.462	0.814	1.918	4.434	0.026	n.d.	10.558	30.513	2.756	12.167	1.968	n.d.	4.208	n.d.	0.545	0.714	n.d.	n.d.	n.d.	100.262
MR3b-19		0.28	29.381	1.086	3.135	6.192	0.044	n.d.	9.643	28.216	2.549	11.066	2.218	n.d.	4.279	n.d.	0.931	0.876	0.01	0.032	n.d.	99.938
MR3b-20		0.31	29.216	0.955	2.693	5.609	0.033	n.d.	9.838	29.318	2.617	11.454	1.998	n.d.	4.275	n.d.	0.78	0.795	n.d.	0.027	n.d.	99.918
MR3b-21		0.224	29.553	0.97	3.016	5.628	0.027	n.d.	9.578	28.494	2.593	11.732	2.165	n.d.	4.361	n.d.	0.863	0.868	n.d.	0.043	n.d.	100.115
MR3b-22		0.255	29.526	0.995	3.164	5.697	0.04	n.d.	9.548	28.682	2.601	11.314	2.16	n.d.	4.368	n.d.	0.878	0.827	n.d.	0.018	n.d.	100.073
MR3b-23		0.272	29.671	1.017	3.34	5.806	0.047	n.d.	9.412	28.229	2.58	11.415	2.217	n.d.	4.393	n.d.	0.936	0.881	n.d.	0.046	n.d.	100.262
MR3b-24		0.292	29.351	1.048	2.85	5.816	0.044	n.d.	9.435	28.713	2.715	11.602	2.278	n.d.	4.324	n.d.	0.812	0.876	n.d.	0.031	n.d.	100.187
MR3b-25		0.301	29.361	1.121	3.223	6.312	0.049	n.d.	8.889	27.595	2.647	11.658	2.344	n.d.	4.381	n.d.	0.901	0.935	n.d.	0.046	n.d.	99.763
MR3b-26		0.275	29.421	0.92	2.502	5.376	0.047	n.d.	10.001	29.392	2.706	11.577	2.034	n.d.	4.218	n.d.	0.72	0.759	n.d.	0.014	n.d.	99.962
MR3b-27		0.309	29.188	0.767	1.354	4.727	0.023	n.d.	10.927	30.886	2.805	12.302	1.725	n.d.	4.033	n.d.	0.394	0.548	n.d.	n.d.	n.d.	99.988
MR3b-28		0.288	29.141	0.844	1.387	5.263	0.024	n.d.	10.846	30.459	2.711	12.198	1.742	n.d.	4.006	n.d.	0.413	0.554	n.d.	n.d.	n.d.	99.876
MR3b-29		0.233	29.62	1.066	3.594	5.82	0.067	n.d.	8.687	27.512	2.543	11.767	2.575	n.d.	4.616	n.d.	1.046	1.04	n.d.	0.037	n.d.	100.223
MR3b-30		0.257	29.468	0.963	2.677	5.525	0.03	n.d.	9.795	28.814	2.647	11.655	2.138	n.d.	4.222	n.d.	0.77	0.78	n.d.	n.d.	n.d.	99.745
MR3b-31		0.24	29.623	0.918	2.38	5.29	0.025	n.d.	9.941	29.632	2.678	11.748	2.076	n.d.	4.285	n.d.	0.678	0.76	n.d.	0.018	n.d.	100.292
MR3b-32		0.232	29.577	0.987	2.933	5.613	0.029	n.d.	9.622	28.596	2.792	11.558	2.112	n.d.	4.287	n.d.	0.813	0.803	n.d.	n.d.	n.d.	99.958
MR3b-33		0.324	29.322	0.833	1.568	5.404	0.032	n.d.	10.807	30.281	2.667	11.636	1.745	n.d.	4.006	n.d.	0.462	0.595	n.d.	n.d.	n.d.	99.682
MR3b-34		0.082	29.602	1.075	1.135	5.055	0.186	n.d.	10.777	30.875	2.648	11.089	1.935	n.d.	4.156	n.d.	0.501	0.604	n.d.	0.039	n.d.	99.759
MR3b-35		0.227	29.796	1.181	3.21	6.306	0.054	n.d.	9.073	27.933	2.583	11.347	2.306	n.d.	4.252	n.d.	0.885	0.881	n.d.	0.045	n.d.	100.079
MR3b-36		0.235	29.853	1.213	3.082	6.487	0.06	n.d.	8.994	27.567	2.624	11.335	2.295	n.d.	4.297	n.d.	0.917	0.923	n.d.	0.069	n.d.	99.951
MR3b-37		0.264	29.515	1.053	3.152	5.913	0.048	n.d.	9.69	28.516	2.653	11.006	2.127	n.d.	4.252	n.d.	0.87	0.795	n.d.	0.034	n.d.	99.888
MR3b-38		0.277	29.687	0.98	3.102	5.601	0.043	n.d.	9.598	28.469	2.644	11.341	2.13	n.d.	4.286	n.d.	0.882	0.812	n.d.	n.d.	n.d.	99.857
MR3b-39		0.239	29.742	1.008	3.048	5.695	0.033	n.d.	9.531	28.305	2.629	11.549	2.18	n.d.	4.314	n.d.	0.934	0.887	n.d.	n.d.	n.d.	100.094
MR3b-40		0.276	29.731	1.033	3.306	5.779	0.049	n.d.	9.399	28.064	2.635	11.579	2.243	n.d.	4.38	n.d.	0.956	0.869	n.d.	0.061	n.d.	100.36
MR3b-41		0.247	29.489	0.974	3.208	5.64	0.055	n.d.	9.771	28.415	2.617	10.997	2.102	n.d.	4.278	n.d.	0.951	0.849	n.d.	0.041	n.d.	99.634
MR3b-42		0.215	29.465	0.828	2.138	4.577	0.023	n.d.	10.759	30.169	2.742	11.449	1.874	n.d.	4.162	n.d.	0.593	0.674	n.d.	n.d.	n.d.	99.668
MR3b-43		0.23	29.897	1.037	3.227	5.587	0.036	n.d.	9.73	28.482	2.712	11.192	2.051	n.d.	4.252	n.d.	0.926	0.831	n.d.	0.027	n.d.	100.217
MR3b-44		0.252	29.886	0.876	2.463	4.994	0.028	n.d.	10.639	29.811	2.609	11.217	1.887	n.d.	4.119	n.d.	0.704	0.729	n.d.	0.052	n.d.	100.266
MR3b-45		0.289	29.673	0.946	2.549	5.555	0.026	n.d.	10.203	29.241	2.701	11.484	1.946	n.d.	4.181	n.d.	0.683	0.756	n.d.	0.017	n.d.	100.25
MR3b-46		0.255	29.814	1.096	3.608	6.071	0.042	n.d.	8.486	27.315	2.599	11.99	2.569	n.d.	4.608	n.d.	1.02	1.049	n.d.	0.072	n.d.	100.594
MR3b-47		0.26	29.578	1.173	3.35	6.764	0.059	n.d.	8.333	27.295	2.585	11.523	2.592	n.d.	4.468	n.d.	1.002	0.968	n.d.	0.059	n.d.	100.009
MR3b-48		0.269	29.796	1.069	3.255	5.977	0.048	n.d.	9.502	28.294	2.464	11.095	2.151	n.d.	4.33	n.d.	0.955	0.857	n.d.	0.046	n.d.	100.108
MR3b-49		0.258	30.067	1.05	2.926	5.937	0.041	n.d.	8.713	28.334	2.627	12.026	2.631	n.d.	4.429	n.d.	0.964	0.976	n.d.	0.057	n.d.	101.036
MR3b-50		0.23	29.948	1.096	2.9	6.003	0.065	n.d.	9.486	28.66	2.684	11.207	2.191	n.d.	4.305	n.d.	0.878	0.852	n.d.	0.045	n.d.	100.55
n.d.: not detected or below detection limit
detection limit(ppm)		32	27	18	70	141	44	119	145	114	193	174	104	309	96	91	109	92	93	92	91

## Sheet: Table S-4
Table S-4. Full results of electron probe micro analysis of monazites in EY137-21.
Spot No.		SiO2	P2O5	CaO	Y2O3	ThO2	UO2	PbO	La2O3	Ce2O3	Pr2O3	Nd2O3	Sm2O3	Eu2O3	Gd2O3	Tb2O3	Dy2O3	Ho2O3	Er2O3	Tm2O3	Yb2O3	Total
EY137-21-01		1.007	28.615	0.631	2.327	6.833	0.195	n.d.	10.554	29.635	2.729	10.529	1.831	n.d.	3.996	n.d.	0.625	0.596	n.d.	0.02	n.d.	100.123
EY137-21-02		2.02	26.889	0.746	2.367	11.882	0.264	n.d.	9.404	26.726	2.444	10.117	1.873	n.d.	3.83	n.d.	0.715	0.674	0.006	0.042	n.d.	99.999
EY137-21-03		2.263	26.418	0.722	2.166	13.271	0.247	n.d.	9.202	26.073	2.497	10.019	1.901	n.d.	3.733	n.d.	0.654	0.665	n.d.	n.d.	n.d.	99.831
EY137-21-04		2.444	25.986	0.814	2.326	14.246	0.292	n.d.	8.845	25.319	2.308	9.882	1.952	n.d.	3.718	n.d.	0.806	0.687	n.d.	0.03	n.d.	99.655
EY137-21-05		1.034	28.533	0.648	2.332	7.036	0.156	n.d.	10.614	29.181	2.564	10.612	1.874	n.d.	3.967	n.d.	0.596	0.653	n.d.	0.015	n.d.	99.815
EY137-21-06		1.435	27.734	0.579	1.9	8.287	0.17	n.d.	10.782	29.312	2.659	10.324	1.734	n.d.	3.875	n.d.	0.55	0.564	0.015	0.001	n.d.	99.921
EY137-21-07		1.766	27.134	0.689	2.173	10.233	0.252	n.d.	9.636	27.997	2.566	10.131	1.809	n.d.	3.736	n.d.	0.604	0.595	n.d.	n.d.	n.d.	99.321
EY137-21-08		2.186	26.402	0.704	1.628	11.434	0.238	n.d.	10.494	27.932	2.414	9.339	1.672	n.d.	3.684	n.d.	0.534	0.5	n.d.	n.d.	n.d.	99.161
EY137-21-09		2.147	26.469	0.685	1.846	12.161	0.204	n.d.	9.874	27.233	2.423	10.032	1.854	n.d.	3.816	n.d.	0.626	0.622	n.d.	0.03	n.d.	100.022
EY137-21-10		0.909	28.533	0.867	2.103	7.835	0.119	n.d.	9.817	29.216	2.704	11.043	2.001	n.d.	3.877	n.d.	0.623	0.647	n.d.	0.034	n.d.	100.328
EY137-21-11		1.029	28.279	0.531	1.954	6.549	0.177	n.d.	11.028	30.314	2.56	10.381	1.732	n.d.	3.942	n.d.	0.546	0.558	n.d.	0.005	n.d.	99.585
EY137-21-12		1.043	28.46	0.533	1.998	6.79	0.162	n.d.	10.755	30.119	2.678	10.508	1.794	n.d.	3.986	n.d.	0.545	0.6	n.d.	0.007	n.d.	99.978
EY137-21-13		1.191	28.156	0.559	1.97	7.553	0.166	n.d.	10.664	29.774	2.653	10.468	1.832	n.d.	4.032	n.d.	0.563	0.559	n.d.	n.d.	n.d.	100.14
EY137-21-14		2.466	25.872	0.717	2.054	13.741	0.196	n.d.	9.269	25.231	2.389	10.293	2.108	n.d.	3.819	n.d.	0.683	0.769	n.d.	0.033	n.d.	99.64
EY137-21-15		2.291	26.263	0.683	1.924	12.911	0.214	n.d.	9.708	26.811	2.347	9.796	1.783	n.d.	3.742	n.d.	0.612	0.646	n.d.	n.d.	n.d.	99.731
EY137-21-16		2.688	25.531	0.721	1.725	14.063	0.23	n.d.	9.749	25.997	2.346	9.637	1.801	n.d.	3.654	n.d.	0.557	0.602	n.d.	0.056	n.d.	99.357
EY137-21-17		1.631	27.145	0.625	1.671	9.161	0.172	n.d.	10.87	28.984	2.441	9.915	1.722	n.d.	3.859	n.d.	0.491	0.529	n.d.	0.013	n.d.	99.229
EY137-21-18		1.144	27.872	0.564	1.982	7.063	0.187	n.d.	10.822	30.024	2.517	10.235	1.7	n.d.	3.849	n.d.	0.519	0.573	n.d.	0.064	n.d.	99.115
EY137-21-19		1.115	28.408	0.596	2.18	6.844	0.159	n.d.	10.508	29.521	2.642	10.721	1.883	n.d.	4.063	n.d.	0.615	0.638	n.d.	0.009	n.d.	99.902
EY137-21-20		1.046	28.642	0.588	2.262	6.647	0.167	n.d.	10.495	29.485	2.631	10.548	1.886	n.d.	3.958	n.d.	0.615	0.65	0.007	0.048	n.d.	99.675
EY137-21-21		1.465	27.763	0.595	1.873	8.565	0.192	n.d.	10.609	29.2	2.497	10.114	1.749	n.d.	3.892	n.d.	0.572	0.558	n.d.	0.049	n.d.	99.693
EY137-21-22		1.616	27.105	0.6	1.979	9.676	0.216	n.d.	10.064	28.511	2.626	10.266	1.831	n.d.	3.921	n.d.	0.545	0.607	n.d.	0.033	n.d.	99.596
EY137-21-23		1.79	27.043	0.633	2.032	10.313	0.225	n.d.	9.867	28.023	2.55	10.31	1.827	n.d.	3.81	n.d.	0.605	0.636	n.d.	0.06	n.d.	99.724
EY137-21-24		1.79	27.07	0.602	1.803	10.543	0.168	n.d.	10.196	27.953	2.452	10.235	1.924	n.d.	3.897	n.d.	0.6	0.608	n.d.	n.d.	n.d.	99.841
EY137-21-25		2.033	26.527	0.797	2.316	11.834	0.239	n.d.	9.518	26.739	2.368	9.868	1.828	n.d.	3.72	n.d.	0.679	0.693	0.007	0.062	n.d.	99.228
EY137-21-26		1.556	27.446	0.645	2.18	9.257	0.172	n.d.	10.117	28.283	2.483	10.453	1.825	n.d.	3.848	n.d.	0.656	0.648	n.d.	0.01	n.d.	99.579
EY137-21-27		2.327	26.059	0.695	1.978	13.444	0.217	n.d.	9.436	26.045	2.411	10.208	1.973	n.d.	3.794	n.d.	0.632	0.665	n.d.	0.025	n.d.	99.909
EY137-21-28		2.319	26.11	0.683	1.997	13.054	0.223	n.d.	9.294	26.194	2.355	9.996	1.931	n.d.	3.849	n.d.	0.655	0.672	n.d.	0.027	n.d.	99.359
EY137-21-29		1.486	27.739	0.539	1.842	8.662	0.132	n.d.	10.46	28.775	2.553	10.617	1.969	n.d.	4.024	n.d.	0.576	0.638	n.d.	0.04	n.d.	100.052
EY137-21-30		2.699	25.171	0.681	1.963	14.874	0.189	n.d.	8.754	24.522	2.342	10.672	2.108	n.d.	3.787	n.d.	0.671	0.732	n.d.	0.05	n.d.	99.215
EY137-21-31		1.487	27.348	0.5	1.652	8.918	0.109	n.d.	10.416	28.174	2.543	10.985	2.046	n.d.	4.004	n.d.	0.562	0.688	n.d.	0.039	n.d.	99.471
EY137-21-32		2.006	26.474	0.757	2.19	11.909	0.16	n.d.	9.249	25.299	2.505	10.896	2.292	n.d.	4.03	n.d.	0.735	0.784	n.d.	0.064	n.d.	99.35
EY137-21-33		1.217	27.814	0.549	1.892	7.46	0.158	n.d.	10.547	29.652	2.66	10.483	1.847	n.d.	4.059	n.d.	0.563	0.574	0.004	0.024	n.d.	99.503
EY137-21-34		1.628	27.286	0.662	2.213	9.612	0.224	n.d.	9.703	28.002	2.612	10.575	1.949	n.d.	3.981	n.d.	0.684	0.651	n.d.	0.021	n.d.	99.803
EY137-21-35		1.687	27.101	0.661	2.15	9.914	0.234	n.d.	9.738	28.019	2.445	10.418	1.874	n.d.	3.852	n.d.	0.643	0.653	n.d.	0.03	n.d.	99.419
EY137-21-36		1.503	27.475	0.641	2.206	9.193	0.213	n.d.	9.991	28.375	2.489	10.387	1.811	n.d.	3.955	n.d.	0.617	0.6	n.d.	0.033	n.d.	99.489
EY137-21-37		1.24	27.815	0.549	1.868	7.585	0.195	n.d.	10.739	29.692	2.594	10.372	1.762	n.d.	4.009	n.d.	0.573	0.554	n.d.	0.047	n.d.	99.594
EY137-21-38		1.966	26.744	0.69	2.157	11.619	0.215	n.d.	9.598	26.95	2.513	10.222	1.922	n.d.	3.848	n.d.	0.687	0.672	n.d.	0.042	n.d.	99.845
EY137-21-39		1.834	27.136	0.595	1.808	10.156	0.193	n.d.	10.233	28.502	2.47	10.154	1.731	n.d.	3.885	n.d.	0.551	0.565	n.d.	0.018	n.d.	99.831
EY137-21-40		0.885	28.63	0.592	2.319	6.054	0.165	n.d.	10.729	29.816	2.639	10.617	1.883	n.d.	3.942	n.d.	0.677	0.595	n.d.	0.057	n.d.	99.6
EY137-21-41		1.165	28.395	0.691	2.617	7.363	0.234	n.d.	10.148	29.154	2.544	10.43	1.874	n.d.	3.969	n.d.	0.67	0.631	n.d.	0.017	n.d.	99.902
EY137-21-42		2.161	26.353	0.681	1.93	12.249	0.21	n.d.	9.755	26.971	2.327	9.87	1.874	n.d.	3.737	n.d.	0.652	0.652	n.d.	0.017	n.d.	99.439
EY137-21-43		1.62	27.58	0.642	1.806	8.944	0.188	n.d.	10.939	29.056	2.577	9.958	1.706	n.d.	3.767	n.d.	0.547	0.512	n.d.	0.003	n.d.	99.845
EY137-21-44		1.039	28.287	0.532	2.074	6.832	0.151	n.d.	10.757	29.687	2.682	10.59	1.904	n.d.	4.094	n.d.	0.588	0.665	n.d.	0.058	n.d.	99.94
EY137-21-45		1.501	27.539	0.647	2.212	9.247	0.175	n.d.	10.141	28.183	2.474	10.546	1.913	n.d.	3.925	n.d.	0.659	0.659	n.d.	0.022	n.d.	99.843
EY137-21-46		0.919	28.453	0.498	2.085	5.841	0.152	n.d.	10.832	30.444	2.705	10.591	1.816	n.d.	4.028	n.d.	0.593	0.597	n.d.	0.023	n.d.	99.577
EY137-21-47		1.962	26.756	0.654	2.056	11.261	0.244	n.d.	9.64	27.566	2.584	10.125	1.697	n.d.	3.82	n.d.	0.619	0.599	n.d.	0.027	n.d.	99.61
EY137-21-48		1.029	28.342	0.512	2.19	6.035	0.173	n.d.	10.831	30.521	2.605	10.674	1.766	n.d.	4.061	n.d.	0.618	0.602	n.d.	0.003	n.d.	99.962
EY137-21-49		2.235	26.434	0.619	1.773	12.172	0.21	n.d.	9.929	27.194	2.387	9.924	1.725	n.d.	3.721	n.d.	0.554	0.59	n.d.	n.d.	n.d.	99.467
EY137-21-50		1.896	26.786	0.721	2.411	11.02	0.258	n.d.	9.271	26.904	2.543	10.318	1.891	n.d.	3.913	n.d.	0.699	0.687	n.d.	0.049	n.d.	99.367
n.d.: not detected or below detection limit
detection limit(ppm)		32	27	18	70	141	44	119	145	114	193	174	104	309	96	91	109	92	93	92	91

## Sheet: Table S-5
Table S-5. Full results of electron probe micro analysis of monazites in NR24-21.
Spot No.		SiO2	P2O5	CaO	Y2O3	ThO2	UO2	PbO	La2O3	Ce2O3	Pr2O3	Nd2O3	Sm2O3	Eu2O3	Gd2O3	Tb2O3	Dy2O3	Ho2O3	Er2O3	Tm2O3	Yb2O3	Total
NR24-21-01		1.942	26.231	0.876	2.188	13.371	0.201	n.d.	9.455	24.92	2.225	10.22	2.054	n.d.	3.738	n.d.	0.709	0.681	n.d.	0.049	n.d.	98.86
NR24-21-02		1.32	27.705	0.929	2.746	10.091	0.149	n.d.	9.531	25.595	2.426	11.057	2.231	n.d.	3.995	n.d.	0.83	0.758	n.d.	0.072	n.d.	99.435
NR24-21-03		1.87	26.54	1.025	2.683	13.604	0.192	n.d.	8.679	23.549	2.359	10.743	2.307	n.d.	3.828	n.d.	0.822	0.725	n.d.	0.074	n.d.	99
NR24-21-04		0.768	28.872	0.71	3.322	5.702	0.255	n.d.	11.066	28.927	2.589	10.051	1.596	n.d.	3.759	n.d.	0.802	0.56	0.045	0.036	n.d.	99.06
NR24-21-05		0.622	29.183	0.56	2.69	4.708	0.136	n.d.	11.533	30.475	2.65	10.347	1.556	n.d.	3.848	n.d.	0.652	0.465	n.d.	n.d.	n.d.	99.425
NR24-21-06		0.675	28.794	0.72	3.183	5.698	0.242	n.d.	11.16	28.997	2.533	9.987	1.563	n.d.	3.782	n.d.	0.691	0.559	0.058	n.d.	n.d.	98.642
NR24-21-07		0.574	29.023	0.526	2.558	4.736	0.126	n.d.	11.664	30.044	2.634	10.265	1.764	n.d.	3.988	n.d.	0.675	0.551	n.d.	0.012	n.d.	99.14
NR24-21-08		0.635	28.923	0.654	3.047	5.528	0.173	n.d.	11.12	28.617	2.507	10.256	1.824	n.d.	4.051	n.d.	0.79	0.66	n.d.	0.018	n.d.	98.803
NR24-21-09		0.962	28.526	0.828	3.202	8.125	0.214	n.d.	9.832	26.665	2.343	10.38	2.136	n.d.	4.067	n.d.	0.936	0.734	n.d.	0.042	n.d.	98.992
NR24-21-10		0.758	28.749	0.75	3.233	6.721	0.162	n.d.	10.37	27.282	2.328	10.736	2.129	n.d.	4.123	n.d.	0.866	0.777	n.d.	0.081	n.d.	99.065
NR24-21-11		0.59	29.076	0.68	3.029	5.558	0.147	n.d.	10.893	28.675	2.534	10.556	1.988	n.d.	4.039	n.d.	0.831	0.705	n.d.	0.012	n.d.	99.321
NR24-21-12		0.379	29.515	0.533	3.051	3.685	0.1	n.d.	11.498	30.088	2.619	10.458	1.782	n.d.	4.069	n.d.	0.783	0.616	n.d.	0.036	n.d.	99.212
NR24-21-13		0.424	28.942	0.546	2.978	4.063	0.108	n.d.	11.553	29.629	2.526	10.528	1.911	n.d.	4.052	n.d.	0.768	0.656	n.d.	n.d.	n.d.	98.687
NR24-21-14		0.544	28.788	0.572	2.613	4.517	0.134	n.d.	11.727	30.138	2.588	10.233	1.726	n.d.	4.006	n.d.	0.682	0.591	n.d.	n.d.	n.d.	98.859
NR24-21-15		0.733	28.71	0.657	2.488	5.732	0.144	n.d.	11.346	29.546	2.519	10.304	1.72	n.d.	4.025	n.d.	0.66	0.588	0.012	0.023	n.d.	99.207
NR24-21-16		0.615	28.735	0.602	2.464	5.229	0.147	n.d.	11.445	29.835	2.555	10.218	1.661	n.d.	3.998	n.d.	0.692	0.577	n.d.	n.d.	n.d.	98.78
NR24-21-17		0.649	28.722	0.468	2.068	5.03	0.117	n.d.	11.878	31.068	2.629	10.387	1.437	n.d.	3.815	n.d.	0.507	0.486	n.d.	n.d.	n.d.	99.261
NR24-21-18		0.849	28.629	0.712	2.407	5.523	0.193	n.d.	11.801	30.198	2.59	9.758	1.501	n.d.	3.8	n.d.	0.599	0.47	n.d.	n.d.	n.d.	99.037
NR24-21-19		0.77	28.533	0.621	2.303	6.07	0.14	n.d.	11.479	29.278	2.442	10.248	1.71	n.d.	3.934	n.d.	0.66	0.578	n.d.	0.044	n.d.	98.81
NR24-21-20		0.771	28.412	0.627	2.79	6.174	0.178	n.d.	11.044	28.775	2.491	10.381	1.809	n.d.	3.973	n.d.	0.689	0.61	n.d.	n.d.	n.d.	98.73
NR24-21-21		0.807	28.436	0.645	2.902	6.506	0.182	n.d.	10.729	28.297	2.483	10.461	1.904	n.d.	4.013	n.d.	0.783	0.647	n.d.	0.045	n.d.	98.84
NR24-21-22		0.797	28.463	0.545	2.306	5.988	0.132	n.d.	11.508	29.472	2.543	10.341	1.698	n.d.	3.929	n.d.	0.68	0.522	n.d.	0.011	n.d.	98.935
NR24-21-23		0.977	27.96	0.784	2.722	7.902	0.128	n.d.	9.977	26.736	2.46	10.798	2.186	n.d.	4.01	n.d.	0.812	0.766	n.d.	0.056	n.d.	98.274
NR24-21-24		0.671	28.608	0.624	2.997	5.637	0.159	n.d.	10.87	28.557	2.508	10.445	1.917	n.d.	4.036	n.d.	0.851	0.651	n.d.	0.017	n.d.	98.548
NR24-21-25		0.511	29.12	0.622	2.765	4.746	0.126	n.d.	11.393	29.355	2.559	10.346	1.819	n.d.	4.044	n.d.	0.763	0.617	n.d.	0.026	n.d.	98.812
NR24-21-26		0.508	29.045	0.661	2.87	4.805	0.12	n.d.	11.398	29.72	2.52	10.648	1.746	n.d.	3.993	n.d.	0.725	0.611	n.d.	0.034	n.d.	99.404
NR24-21-27		0.522	28.965	0.625	2.947	4.854	0.126	n.d.	11.241	29.214	2.618	10.413	1.83	n.d.	4.043	n.d.	0.772	0.644	n.d.	n.d.	n.d.	98.817
NR24-21-28		0.572	28.958	0.63	2.81	5.373	0.132	n.d.	11.098	28.866	2.573	10.554	1.995	n.d.	4.103	n.d.	0.775	0.697	n.d.	0.023	n.d.	99.159
NR24-21-29		0.419	29.165	0.502	2.255	3.914	0.122	n.d.	12.156	31.196	2.629	10.251	1.544	n.d.	3.875	n.d.	0.602	0.499	n.d.	n.d.	n.d.	99.129
NR24-21-30		0.804	28.624	0.616	2.637	6.1	0.168	n.d.	11.239	29.65	2.597	10.325	1.623	n.d.	3.897	n.d.	0.705	0.513	n.d.	n.d.	n.d.	99.498
NR24-21-31		1.234	27.796	0.81	2.813	9.097	0.178	n.d.	9.678	26.271	2.523	10.833	2.173	n.d.	3.979	n.d.	0.762	0.749	n.d.	0.032	n.d.	98.928
NR24-21-32		0.52	29.149	0.615	2.919	4.711	0.138	n.d.	11.224	29.416	2.517	10.61	1.91	n.d.	4.154	n.d.	0.763	0.632	n.d.	0.047	n.d.	99.325
NR24-21-33		0.644	28.922	0.611	2.877	5.464	0.179	n.d.	11.035	28.954	2.537	10.431	1.867	n.d.	4.005	n.d.	0.792	0.63	n.d.	n.d.	n.d.	98.952
NR24-21-34		1.24	27.652	0.758	2.171	8.786	0.179	n.d.	10.926	28.092	2.386	9.776	1.613	n.d.	3.728	n.d.	0.631	0.529	n.d.	n.d.	n.d.	98.467
NR24-21-35		0.373	29.348	0.546	2.361	3.553	0.127	n.d.	12.069	31.315	2.661	10.342	1.632	n.d.	3.926	n.d.	0.596	0.512	0.012	n.d.	n.d.	99.373
NR24-21-36		1.415	27.512	0.844	2.67	10.072	0.137	n.d.	9.418	25.358	2.405	11.126	2.318	n.d.	4.097	n.d.	0.766	0.796	n.d.	0.028	n.d.	98.962
NR24-21-37		0.572	29.05	0.57	2.715	4.916	0.093	n.d.	11.027	28.966	2.697	11.077	2.089	n.d.	4.176	n.d.	0.774	0.758	n.d.	n.d.	n.d.	99.48
NR24-21-38		0.642	28.96	0.649	2.779	5.205	0.192	n.d.	11.311	29.661	2.584	10.219	1.646	n.d.	3.941	n.d.	0.755	0.551	0.028	n.d.	n.d.	99.123
NR24-21-39		0.654	28.778	0.58	2.497	5.346	0.164	n.d.	11.506	29.991	2.609	10.346	1.603	n.d.	3.864	n.d.	0.672	0.529	n.d.	n.d.	n.d.	99.139
NR24-21-40		0.927	28.187	0.698	2.786	7.129	0.154	n.d.	10.252	27.563	2.497	10.827	2.144	n.d.	4.087	n.d.	0.791	0.756	n.d.	0.033	n.d.	98.831
NR24-21-41		0.928	28.533	0.769	3.19	7.292	0.205	n.d.	10.229	27.244	2.416	10.545	2.04	n.d.	4.037	n.d.	0.857	0.745	n.d.	0.056	n.d.	99.086
NR24-21-42		0.431	29.149	0.546	3.072	3.742	0.115	n.d.	11.319	29.68	2.601	10.659	1.831	n.d.	4.121	n.d.	0.79	0.645	n.d.	0.013	n.d.	98.721
NR24-21-43		0.51	29.031	0.502	2.325	4.222	0.117	n.d.	12.059	30.933	2.617	10.171	1.619	n.d.	3.903	n.d.	0.598	0.484	n.d.	0.029	n.d.	99.12
NR24-21-44		2.834	24.41	0.983	2.586	17.868	0.257	n.d.	7.545	21.342	2.168	10.336	2.097	n.d.	3.636	n.d.	0.779	0.732	n.d.	0.042	n.d.	97.615
NR24-21-45		0.441	29.356	0.604	2.902	4.227	0.125	n.d.	11.639	29.759	2.605	10.29	1.749	n.d.	4.019	n.d.	0.753	0.596	n.d.	n.d.	n.d.	99.065
NR24-21-46		0.448	29.423	0.549	2.853	3.934	0.106	n.d.	11.739	29.934	2.583	10.864	1.846	n.d.	4.075	n.d.	0.69	0.67	0.015	0.015	n.d.	99.744
NR24-21-47		1.17	27.631	0.741	2.06	8.644	0.211	n.d.	11.383	28.807	2.422	9.601	1.356	n.d.	3.558	n.d.	0.55	0.413	n.d.	n.d.	n.d.	98.547
NR24-21-48		0.708	28.74	0.729	3.535	6.037	0.237	n.d.	10.591	28.038	2.484	10.284	1.818	n.d.	3.987	n.d.	0.875	0.747	n.d.	0.036	n.d.	98.847
NR24-21-49		0.711	28.749	0.721	3.535	6.129	0.219	n.d.	10.498	28.078	2.412	10.272	1.849	n.d.	3.98	n.d.	0.862	0.674	n.d.	0.044	n.d.	98.733
NR24-21-50		0.701	28.98	0.774	3.508	6.08	0.254	n.d.	10.568	27.653	2.472	10.031	1.867	n.d.	3.915	n.d.	0.867	0.694	n.d.	0.009	n.d.	98.374
n.d.: not detected or below detection limit
detection limit(ppm)		32	27	18	70	141	44	119	145	114	193	174	104	309	96	91	109	92	93	92	91
