# Supplementary material for: Short communication: Inverse correlation between radiation damage and fission-track etching time on monazite
Source: Copernicus journal article supplement (doi:10.5194/gchron-6-313-2024), 2024-07-03
Supplement: Supplementary file 2 [file Tables_S6-S10_raman.xlsx]

## Sheet: Table S-6
Table S-6. Results of Raman spectroscopic analysis and estimation of the degree of radiation damage (ΔFWHM) of monazites in Toya-5b.
Spot No.		v1 (PO4) Raman band					EPMA			ΔFWHM (cm-1)
		Area	Amplitude	Center	FWHMmeas. (cm-1)		Th+U+Ca+Pb (apfu)	FWHMcalc. (cm-1)
Toya-5b-01		6276.71	792.434	972.633	4.84271		0.0263999	4.65382		0.188886
Toya-5b-02		6201.22	822.344	972.973	4.57448		0.0266379	4.66017		-0.08569
Toya-5b-03		4991.93	594.926	973.022	5.13801		0.0281382	4.70016		0.437848
Toya-5b-04		5160.83	604.681	972.639	5.30274		0.0270432	4.67097		0.631766
Toya-5b-05		5161.07	604.687	972.637	5.30277		0.0244783	4.60259		0.700177
Toya-5b-06		8202.53	939.639	972.434	5.39367		0.0299635	4.74883		0.644848
Toya-5b-07		8033.31	999.793	972.897	4.90262		0.0314041	4.78723		0.115392
Toya-5b-08		7178.79	822.898	973.092	5.3576		0.0308711	4.77302		0.584573
Toya-5b-09		6992.82	811.218	972.803	5.30231		0.0271412	4.67358		0.628724
Toya-5b-10		4550.4	541.111	972.732	5.15023		0.0267	4.66182		0.488412
Toya-5b-11		3907.28	509.236	972.994	4.90207		0.0288966	4.72038		0.181687
Toya-5b-12		8341.47	1030.36	973.07	4.94286		0.0300012	4.74983		0.193024
Toya-5b-13		8492.32	1064.12	972.997	4.88561		0.026924	4.66779		0.217822
Toya-5b-14		8020.32	1010.05	973.011	4.84001		0.0298231	4.74508		0.0949257
Toya-5b-15		11140	1318.8	972.939	5.17309		0.0243421	4.59896		0.574128
Toya-5b-16		11060	1423.53	972.946	4.72431		0.0233798	4.57331		0.151001
Toya-5b-17		4126.96	512.717	972.943	4.91205		0.0308514	4.7725		0.139557
Toya-5b-18		4324.64	520.254	972.266	5.12362		0.0265373	4.65749		0.466132
Toya-5b-19		4091.55	520.413	972.727	4.82669		0.0285754	4.71182		0.114867
Toya-5b-20		4091.51	520.412	972.727	4.82668		0.0254172	4.62762		0.199055
Toya-5b-21		7904	986.909	972.74	4.88733		0.0281935	4.70164		0.185686
Toya-5b-22		7563.69	920.707	972.623	5.03442		0.029878	4.74655		0.287869
Toya-5b-23		7832.75	1004.73	972.587	4.74404		0.0270236	4.67045		0.0735924
Toya-5b-24		9942.71	1159.25	972.758	5.26076		0.0275995	4.6858		0.574959
Toya-5b-25		10930	1389.88	972.212	4.78816		0.0292747	4.73046		0.0576985
Toya-5b-26		10290	1293.91	972.445	4.8496		0.0266615	4.66079		0.188809
Toya-5b-27		10680	1358.1	972.573	4.79009		0.0279568	4.69533		0.0947596
Toya-5b-28		8447.75	1028.19	972.368	5.02256		0.0327243	4.82243		0.200133
Toya-5b-29		8903	1099.79	972.841	4.94252		0.0301206	4.75302		0.189503
Toya-5b-30		8258.21	970.644	972.356	5.21533		0.0282517	4.70319		0.512137
Toya-5b-31		9311.54	1148.36	972.6	4.95135		0.0253355	4.62544		0.325901
Toya-5b-32		10400	1285.42	972.494	4.94045		0.0281356	4.7001		0.240357
Toya-5b-33		9304.62	1113.8	972.615	5.11362		0.0290332	4.72403		0.389599
Toya-5b-34		7880.75	955.649	972.942	5.04262		0.0264392	4.65487		0.387753
Toya-5b-35		4451.32	556.321	972.665	4.88035		0.0287333	4.71603		0.164318
Toya-5b-36		4305.52	541.628	972.589	4.8458		0.029422	4.73439		0.111404
Toya-5b-37		4655.79	573.296	972.655	4.95966		0.0292336	4.72937		0.230294
Toya-5b-38		4482.68	533.498	972.593	5.15574		0.0305073	4.76332		0.39242
Toya-5b-39		9680.09	1213.3	972.616	4.86508		0.0317988	4.79776		0.0673249
Toya-5b-40		10120	1239.78	972.828	4.98699		0.0290131	4.72349		0.2635
Toya-5b-41		9999.85	1258.04	972.641	4.84547		0.0243646	4.59956		0.245915
Toya-5b-42		7202.58	921.952	972.093	4.80594		0.0275051	4.68329		0.122655
Toya-5b-43		3828.6	461.528	972.586	5.09767		0.0347493	4.87642		0.221254
Toya-5b-44		3673.64	447.432	972.371	5.07879		0.0296215	4.73971		0.339085
Toya-5b-45		6327.75	792.626	972.663	4.86837		0.030008	4.75001		0.118357
Toya-5b-46		5942.14	736.588	972.107	4.92391		0.0338949	4.85364		0.0702744
Toya-5b-47		4092.84	527.664	971.498	4.80052		0.0273567	4.67933		0.121191
Toya-5b-48		8222.81	1028.09	972.419	4.87819		0.0269265	4.66786		0.210332
Toya-5b-49		7775.48	916.834	972.796	5.19739		0.0300033	4.74989		0.447501
Toya-5b-50		7953.26	971.024	972.68	5.00565		0.030477	4.76252		0.243133

## Sheet: Table S-7
Table S-7. Results of Raman spectroscopic analysis and estimation of the degree of radiation damage (ΔFWHM) of monazites in KRG19-B04.
Spot No.		v1 (PO4) Raman band					EPMA			ΔFWHM (cm-1)
		Area	Amplitude	Center	FWHMmeas. (cm-1)		Th+U+Ca+Pb (apfu)	FWHMcalc. (cm-1)
KRG19-B04-01		4940.27	450.727	973.469	6.82105		0.105241	6.75571		0.0653337
KRG19-B04-02		5580.9	464.587	974.188	7.50425		0.0986976	6.58128		0.922976
KRG19-B04-03		9669.62	870.704	973.677	6.91527		0.108244	6.83578		0.0794869
KRG19-B04-04		9937.7	867.289	974.205	7.14458		0.102154	6.67342		0.471163
KRG19-B04-05		9776.77	854.049	973.792	7.13757		0.0942387	6.4624		0.675167
KRG19-B04-06		11770	830.522	973.264	8.90019		0.104688	6.74098		2.15921
KRG19-B04-07		11440	1082.61	973.298	6.56401		0.0991558	6.59349		-0.0294808
KRG19-B04-08		9559.99	934.635	972.581	6.34395		0.0666805	5.7277		0.616243
KRG19-B04-09		9497.92	805.751	973.536	7.35836		0.0989289	6.58745		0.770913
KRG19-B04-10		10820	881.288	973.63	7.67859		0.104257	6.72949		0.949097
KRG19-B04-11		6494.5	516.355	973.645	7.87027		0.111835	6.93152		0.938742
KRG19-B04-12		6979.69	553.322	973.772	7.89395		0.0826347	6.15304		1.74091
KRG19-B04-13		6426.07	654.802	973.795	6.0729		0.0892918	6.33052		-0.257623
KRG19-B04-14		6245.37	651.797	973.196	5.92106		0.0943427	6.46518		-0.544121
KRG19-B04-15		9526.21	791.899	972.693	7.51526		0.114102	6.99196		0.523298
KRG19-B04-16		9813.38	890.486	972.728	6.85981		0.0945661	6.47113		0.388673
KRG19-B04-17		9337.86	816.576	972.307	7.12966		0.108133	6.83284		0.296823
KRG19-B04-18		5308.86	436.764	973.735	7.59654		0.110424	6.89389		0.702645
KRG19-B04-19		6068.01	476.798	973.696	7.96672		0.111411	6.92021		1.0465
KRG19-B04-20		9278.14	837.266	973.411	6.89963		0.0878212	6.29131		0.608317
KRG19-B04-21		11720	973.173	973.132	7.5263		0.0926646	6.42044		1.10587
KRG19-B04-22		12880	1305.85	972.5	6.103		0.0735114	5.90981		0.193183
KRG19-B04-23		14030	1194.9	972.823	7.32917		0.115061	7.01754		0.311639
KRG19-B04-24		8083.19	661.756	973.565	7.63528		0.107185	6.80755		0.827732
KRG19-B04-25		6465.67	757.831	972.198	5.23105		0.0371036	4.93918		0.291873
KRG19-B04-26		4655.92	527.441	971.988	5.42579		0.0540226	5.39024		0.0355469
KRG19-B04-27		4627.09	529.817	971.995	5.3639		0.0573879	5.47996		-0.116056
KRG19-B04-28		11750	943.033	973.834	7.7914		0.113007	6.96277		0.828633
KRG19-B04-29		11370	905.729	973.857	7.85497		0.117266	7.07632		0.778649
KRG19-B04-30		8521.38	857.814	973.235	6.15141		0.104312	6.73095		-0.579539
KRG19-B04-31		9199.27	887.708	973.404	6.43163		0.0637273	5.64897		0.782656
KRG19-B04-32		4969.46	471.767	973.461	6.54298		0.07661	5.99242		0.550561
KRG19-B04-33		4961.71	439.027	973.618	7.04274		0.0966654	6.5271		0.515641
KRG19-B04-34		10110	1252.53	971.658	4.92886		0.0484137	5.24071		-0.311852
KRG19-B04-35		6830.46	596.006	972.35	7.14591		0.0925254	6.41673		0.729184
KRG19-B04-36		7078.56	660.894	972.251	6.65824		0.0717506	5.86287		0.795365
KRG19-B04-37		10930	896.819	972.745	7.61908		0.0961858	6.51431		1.10476
KRG19-B04-38		10780	938.478	973.535	7.1603		0.0948459	6.47859		0.681711
KRG19-B04-39		10750	984.166	973.134	6.7992		0.0845518	6.20415		0.595051
KRG19-B04-40		9218.06	864.929	972.286	6.6237		0.0846694	6.20729		0.416418
KRG19-B04-41		10870	1040.51	972.315	6.48846		0.0821009	6.13881		0.349656
KRG19-B04-42		8304.08	736.062	973.249	7.02985		0.0879501	6.29475		0.735101
KRG19-B04-43		8617.53	743.051	972.657	7.23494		0.0964168	6.52047		0.714468
KRG19-B04-44		8383.95	848.741	972.862	6.11498		0.0985435	6.57717		-0.462193
KRG19-B04-45		9015.69	818.046	973.364	6.86029		0.104451	6.73467		0.125625
KRG19-B04-46		5709.56	470.494	973.063	7.58376		0.0704911	5.82929		1.75447
KRG19-B04-47		7106.43	629.05	973.257	7.0398		0.10421	6.72824		0.311565
KRG19-B04-48		13650	1128.05	973.338	7.55855		0.104175	6.72731		0.831233
KRG19-B04-49		5249.62	589.305	972.36	5.47895		0.0389368	4.98806		0.490895
KRG19-B04-50		6751.31	595.243	973.328	7.06906		0.0834107	6.17373		0.895327

## Sheet: Table S-8
Table S-8. Results of Raman spectroscopic analysis and estimation of the degree of radiation damage (ΔFWHM) of monazites in MR3b.
Spot No.		v1 (PO4) Raman band					EPMA			ΔFWHM (cm-1)
		Area	Amplitude	Center	FWHMmeas. (cm-1)		Th+U+Ca+Pb (apfu)	FWHMcalc. (cm-1)
MR3b-01		4151.16	218.256	973.219	12.0174		0.108291	6.83703		5.18035
MR3b-02		3836.5	210.511	973.027	11.5073		0.0947473	6.47596		5.03138
MR3b-03		4554.05	255.594	973.105	11.246		0.103048	6.69727		4.54872
MR3b-04		4386.43	251.645	972.998	10.9978		0.102539	6.6837		4.31411
MR3b-05		4671.63	278.355	972.819	10.5815		0.091289	6.38376		4.19769
MR3b-06		4691.26	266.443	973.092	11.1108		0.0922713	6.40995		4.70085
MR3b-07		8246.44	533.604	973.318	9.72679		0.0881642	6.30046		3.42633
MR3b-08		8103.06	491.446	972.785	10.392		0.0873099	6.27768		4.11429
MR3b-09		10250	579.979	973.303	11.1533		0.0924246	6.41404		4.73923
MR3b-10		3839.78	276.314	971.195	8.72272		0.0728262	5.89155		2.83117
MR3b-11		8214.2	483.154	972.253	10.7217		0.0904218	6.36065		4.36106
MR3b-12		8971.16	529.494	972.43	10.6842		0.090717	6.36852		4.31571
MR3b-13		8881.91	472.91	972.81	11.8645		0.10747	6.81516		5.04939
MR3b-14		8681.51	500.722	972.927	10.938		0.102325	6.67798		4.26006
MR3b-15		5468.66	328.203	972.914	10.504		0.0990102	6.58961		3.91435
MR3b-16		5333.86	313.339	972.668	10.7355		0.0890258	6.32343		4.41204
MR3b-17		8117.24	527.92	971.961	9.67636		0.0834973	6.17604		3.50032
MR3b-18		7851.86	512.593	972.066	9.63903		0.0741154	5.92592		3.71311
MR3b-19		4282.46	268.281	972.915	10.0539		0.101399	6.65328		3.40065
MR3b-20		5124.89	340.013	972.132	9.48106		0.0908252	6.3714		3.10966
MR3b-21		11590	715.641	972.331	10.2071		0.0911821	6.38092		3.82619
MR3b-22		11950	754.417	971.982	9.97569		0.0928954	6.42659		3.5491
MR3b-23		9649.57	565.937	972.935	10.7534		0.094556	6.47086		4.28257
MR3b-24		4110.54	274.025	972.517	9.43468		0.096327	6.51808		2.9166
MR3b-25		4396.18	255.734	972.699	10.8432		0.104106	6.72547		4.11777
MR3b-26		5435.81	342.706	972.02	9.98886		0.0872538	6.27619		3.71267
MR3b-27		10290	684.391	971.446	9.45509		0.0751595	5.95375		3.50133
MR3b-28		10150	667.613	971.467	9.564		0.083396	6.17334		3.39066
MR3b-29		5058.25	291.791	973.141	10.9363		0.0969446	6.53454		4.40171
MR3b-30		4959.88	309.037	972.624	10.1098		0.0903027	6.35747		3.75238
MR3b-31		4972.86	344.466	971.898	9.07106		0.0858962	6.23999		2.83106
MR3b-32		5043.08	305.492	972.591	10.4047		0.091809	6.39763		4.00711
MR3b-33		6942.87	447.712	971.741	9.76104		0.0842011	6.1948		3.56624
MR3b-34		4755.95	296.739	971.638	10.0956		0.0924614	6.41502		3.68062
MR3b-35		4584.16	268.38	972.966	10.7729		0.105935	6.77423		3.99863
MR3b-36		4934.15	309.16	972.961	10.0522		0.109047	6.8572		3.19499
MR3b-37		4289.15	251.804	972.889	10.7426		0.0974312	6.54752		4.19503
MR3b-38		11020	648.928	972.758	10.7057		0.0914132	6.38708		4.31861
MR3b-39		4788.48	279.497	972.889	10.8061		0.0931924	6.43451		4.37155
MR3b-40		3665.19	221.191	972.728	10.4447		0.0948754	6.47938		3.96535
MR3b-41		4285.6	252.381	972.936	10.7085		0.0919793	6.40217		4.3063
MR3b-42		5008.53	330.627	972.416	9.52999		0.0761896	5.98121		3.54878
MR3b-43		5669.9	346.844	972.853	10.3012		0.0931444	6.43323		3.86801
MR3b-44		5555.9	352.206	972.541	9.93297		0.0812767	6.11684		3.81613
MR3b-45		6874.12	414.768	972.678	10.4467		0.0893363	6.33171		4.11504
MR3b-46		12150	666.535	973.395	11.5086		0.0997838	6.61024		4.89835
MR3b-47		13030	705.052	973.294	11.6706		0.110118	6.88575		4.78483
MR3b-48		6813.61	375.035	973.121	11.4709		0.0982451	6.56922		4.90171
MR3b-49		5359.86	342.246	972.357	9.85979		0.0963441	6.51853		3.34125
MR3b-50		5548.49	328.458	972.904	10.6519		0.0994297	6.6008		4.05106

## Sheet: Table S-9
Table S-9. Results of Raman spectroscopic analysis and estimation of the degree of radiation damage (ΔFWHM) of monazites in EY137-21.
Spot No.		v1 (PO4) Raman band					EPMA			ΔFWHM (cm-1)
		Area	Amplitude	Center	FWHMmeas. (cm-1)		Th+U+Ca+Pb (apfu)	FWHMcalc. (cm-1)
EY137-21-01		12370	613.208	971.448	12.7547		0.0899177	6.34721		6.40753
EY137-21-02		8864	343.766	971.536	16.348		0.143267	7.76951		8.57851
EY137-21-03		9284.53	358.387	971.29	16.4256		0.155899	8.10626		8.31938
EY137-21-04		9656.6	366.333	971.174	16.7156		0.170064	8.48391		8.23172
EY137-21-05		9220.47	469.724	971.475	12.4084		0.0923851	6.41299		5.99543
EY137-21-06		10860	522.766	971.433	13.1445		0.101603	6.65875		6.48578
EY137-21-07		10800	447.969	971.386	15.2732		0.125875	7.30582		7.96739
EY137-21-08		5861.44	227.998	971.245	16.299		0.138435	7.64067		8.6583
EY137-21-09		5783.05	253.544	971.401	14.4446		0.1434	7.77305		6.67157
EY137-21-10		5140.02	221.502	971.563	14.6983		0.108344	6.83844		7.85985
EY137-21-11		10120	522.666	971.149	12.2314		0.0836585	6.18033		6.05105
EY137-21-12		10380	519.101	971.24	12.6488		0.0854402	6.22784		6.42101
EY137-21-13		10590	522.41	971.253	12.8196		0.0936302	6.44618		6.37343
EY137-21-14		9977.9	425.148	971.511	14.8671		0.160567	8.23073		6.63642
EY137-21-15		11040	476.691	971.509	14.6719		0.150889	7.9727		6.69924
EY137-21-16		11720	412.028	971.182	18.0478		0.16472	8.34144		9.70639
EY137-21-17		10880	482.21	971.109	14.292		0.112733	6.95547		7.33653
EY137-21-18		9720.33	491.387	971.123	12.5058		0.090461	6.36169		6.14409
EY137-21-19		10420	522.35	971.269	12.6171		0.0884974	6.30934		6.30772
EY137-21-20		10920	541.817	971.258	12.7432		0.0864336	6.25432		6.48892
EY137-21-21		9649.01	450.532	970.982	13.5536		0.105225	6.75529		6.79832
EY137-21-22		12020	534.2	971.346	14.2511		0.116689	7.06093		7.19017
EY137-21-23		13200	567.009	971.341	14.7467		0.123896	7.25305		7.49364
EY137-21-24		5046.85	213.76	971.199	14.9572		0.124174	7.26048		7.69668
EY137-21-25		11260	484.643	971.398	14.716		0.146005	7.84248		6.87354
EY137-21-26		11030	490.729	971.348	14.2333		0.113814	6.98429		7.24899
EY137-21-27		9392.85	353.117	971.178	16.8688		0.156642	8.12607		8.7427
EY137-21-28		9608.88	355.461	971.313	17.1451		0.152986	8.0286		9.11648
EY137-21-29		9925.53	486.455	971.072	12.9046		0.103031	6.6968		6.20784
EY137-21-30		8820.25	390.51	971.106	14.3023		0.171359	8.51842		5.7839
EY137-21-31		9052.01	373.186	971.259	15.3704		0.104522	6.73657		8.63385
EY137-21-32		4651.61	175.901	971.542	16.7695		0.144492	7.80217		8.96734
EY137-21-33		4742.09	216.422	971.325	13.8702		0.0930289	6.43015		7.44002
EY137-21-34		10080	439.229	971.639	14.5294		0.11826	7.10282		7.42657
EY137-21-35		10830	468.108	971.529	14.6555		0.121651	7.19323		7.46229
EY137-21-36		10020	433.033	971.392	14.6498		0.113551	6.97727		7.67249
EY137-21-37		4550.25	217.496	971.255	13.236		0.0944625	6.46837		6.76767
EY137-21-38		5068.25	206.719	971.526	15.5377		0.138543	7.64355		7.89415
EY137-21-39		10870	502.496	971.182	13.691		0.120293	7.15701		6.53402
EY137-21-40		10540	539.122	971.262	12.3544		0.0813043	6.11757		6.23684
EY137-21-41		5628.03	224.164	971.946	15.9144		0.0977202	6.55522		9.35921
EY137-21-42		9519.56	401.154	971.177	15.0342		0.144842	7.81148		7.22277
EY137-21-43		10200	404.005	971.001	16.0055		0.110515	6.89634		9.10914
EY137-21-44		9616.16	491.236	971.073	12.3737		0.0858886	6.23979		6.13394
EY137-21-45		9865.9	421.474	971.241	14.828		0.113599	6.97856		7.84948
EY137-21-46		10250	533.881	971.025	12.1325		0.0754646	5.96189		6.17065
EY137-21-47		9698.93	394.568	971.409	15.5783		0.134121	7.52567		8.05266
EY137-21-48		9929.43	493.544	971.316	12.7219		0.0777563	6.02298		6.69893
EY137-21-49		11170	455.475	970.921	15.5349		0.141274	7.71637		7.81856
EY137-21-50		10490	444.979	971.471	14.9402		0.134945	7.54763		7.39254

## Sheet: Table S-10
Table S-10. Results of Raman spectroscopic analysis and estimation of the degree of radiation damage (ΔFWHM) of monazites in NR24-21.
Spot No.		v1 (PO4) Raman band					EPMA			ΔFWHM (cm-1)
		Area	Amplitude	Center	FWHMmeas. (cm-1)		Th+U+Ca+Pb (apfu)	FWHMcalc. (cm-1)
NR24-21-01		11020	418.671	971.607	16.6955		0.164992	8.34868		8.34682
NR24-21-02		9994.12	434.935	972.15	14.5531		0.13331	7.50405		7.04908
NR24-21-03		11090	419.827	972.051	16.7467		0.17264	8.55258		8.19408
NR24-21-04		9026.67	441.251	971.643	12.9387		0.0836884	6.18113		6.7576
NR24-21-05		8111.85	463.986	971.39	11.0312		0.0671219	5.73947		5.29168
NR24-21-06		8314.07	432.93	971.676	12.1357		0.0843705	6.19932		5.93638
NR24-21-07		8621.71	454.134	971.726	11.9951		0.0662111	5.71519		6.27991
NR24-21-08		8724.15	454.427	971.775	12.1318		0.0793632	6.06582		6.06599
NR24-21-09		9987.53	444.296	972.125	14.2338		0.110975	6.90859		7.32523
NR24-21-10		10730	487.383	972.107	13.9372		0.0941823	6.4609		7.4763
NR24-21-11		9855.57	532.067	971.959	11.6989		0.0801281	6.08622		5.61265
NR24-21-12		11670	662.193	971.8	11.1252		0.056398	5.45357		5.67163
NR24-21-13		11520	626.099	971.795	11.624		0.0609899	5.57599		6.04803
NR24-21-14		8414.45	472.392	971.689	11.2427		0.0664724	5.72215		5.52056
NR24-21-15		8400.61	415.102	971.595	12.7981		0.0810746	6.11145		6.68661
NR24-21-16		8465.63	443.796	971.798	12.0532		0.0744834	5.93573		6.11745
NR24-21-17		11380	585.67	971.29	12.2764		0.0665674	5.72469		6.55167
NR24-21-18		12640	642.621	971.546	12.4298		0.0818699	6.13265		6.29713
NR24-21-19		8822.81	466.099	971.328	11.9593		0.083077	6.16483		5.79442
NR24-21-20		8608.82	460.609	971.434	11.806		0.0846461	6.20666		5.5993
NR24-21-21		9275.02	470.399	971.601	12.4647		0.0884143	6.30713		6.15759
NR24-21-22		10220	540.391	971.369	11.9493		0.0790007	6.05616		5.89317
NR24-21-23		5639.92	264.853	971.997	13.4752		0.107589	6.81833		6.65691
NR24-21-24		5470.08	282.643	971.83	12.2313		0.0793739	6.06611		6.16521
NR24-21-25		10130	541.589	971.684	11.8177		0.0704221	5.82745		5.99025
NR24-21-26		10750	550.162	971.566	12.354		0.0722504	5.87619		6.47782
NR24-21-27		9929.42	540.132	971.649	11.6091		0.0715846	5.85844		5.75068
NR24-21-28		9243.82	473.643	971.671	12.3359		0.0764754	5.98883		6.34707
NR24-21-29		6963.54	411.967	971.071	10.6587		0.0576986	5.48825		5.17042
NR24-21-30		9470.99	508.269	971.305	11.7699		0.0827566	6.15629		5.61356
NR24-21-31		10290	472.33	972.073	13.7833		0.11966	7.14013		6.64312
NR24-21-32		10420	565.926	971.787	11.624		0.0696183	5.80602		5.81801
NR24-21-33		9876.78	529.81	971.798	11.7752		0.0769845	6.00241		5.77278
NR24-21-34		10570	492.629	971.571	13.5763		0.115217	7.02168		6.55458
NR24-21-35		9173.61	536.605	971.535	10.7824		0.0560882	5.44531		5.33706
NR24-21-36		10740	452.369	971.903	15.0457		0.130064	7.41751		7.62821
NR24-21-37		10890	573.575	971.533	11.9976		0.0692214	5.79544		6.20212
NR24-21-38		7337.07	392.237	971.446	11.816		0.0761651	5.98056		5.83541
NR24-21-39		7645.59	377.236	971.499	12.8172		0.0745202	5.93671		6.88052
NR24-21-40		10100	522.679	971.703	12.2105		0.0963412	6.51846		5.69204
NR24-21-41		10180	500.893	972.035	12.8545		0.100638	6.63301		6.22147
NR24-21-42		11370	646.767	971.623	11.0943		0.0579528	5.49502		5.59923
NR24-21-43		11740	660.906	971.322	11.2065		0.0604951	5.5628		5.64369
NR24-21-44		10730	355.354	971.746	19.159		0.217767	9.75566		9.40329
NR24-21-45		10160	571.967	971.766	11.2166		0.0646297	5.67303		5.54359
NR24-21-46		11270	611.916	971.615	11.6339		0.0591929	5.52808		6.10582
NR24-21-47		10780	503.21	971.099	13.555		0.113502	6.97597		6.57905
NR24-21-48		9879.63	499.429	971.953	12.5061		0.0876993	6.28806		6.21799
NR24-21-49		10230	509.617	971.999	12.6975		0.0881199	6.29928		6.39819
NR24-21-50		9860.95	484.462	972.08	12.873		0.0902021	6.35479		6.51824
